# Supplementary material for: Shaping interventions to address waterpipe smoking in Arabic-speaking communities in Sydney, Australia: a qualitative study
Source: Springer Nature journal article supplement (doi:10.1186/s12889-018-6270-3), 2018-12-01
Supplement: MOESM2 [file 16347666]

**Supplementary table 1. Characteristics of focus group participants (n=88)**

| <b>Group</b>           | <b>Number of participants</b> | <b>Gender</b>                                | <b>Age group (years)</b>                                                           | <b>Language(s) spoken in the focus group</b>          | <b>Country of birth</b>                                                                                                    |
|------------------------|-------------------------------|----------------------------------------------|------------------------------------------------------------------------------------|-------------------------------------------------------|----------------------------------------------------------------------------------------------------------------------------|
| <b>1. Mixed</b>        | 11                            | Female = 5<br>Male = 6                       | 18-25 = 3<br>26-35 = 5<br>36-50 = 2<br>51-60 = 1                                   | English with Arabic translation for some participants | Lebanon = 6<br>Australia = 3<br>Bahrain = 1<br>Iraq = 1                                                                    |
| <b>2. Young men</b>    | 9                             | Male = 9                                     | 18-25 = 6<br>26-35 = 3                                                             | Mainly English with some Arabic                       | Australia = 7<br>Iraq = 1<br>Lebanon = 1                                                                                   |
| <b>3. Young adults</b> | 9                             | Female = 1<br>Male = 8                       | 18-25 = 8<br>Not reported = 1                                                      | Arabic and English                                    | Australia = 9                                                                                                              |
| <b>4. Mixed</b>        | 9                             | Female = 6<br>Male = 2<br>Not reported = 1   | 18-25 = 4<br>26-35 = 3<br>36-50 = 2                                                | Arabic and English                                    | Lebanon = 6<br>Australia = 2<br>Syria = 1                                                                                  |
| <b>5. Mixed</b>        | 8                             | Female = 5<br>Male = 3                       | 26-35 = 4<br>36-50 = 3<br>60+ = 1                                                  | Arabic and English                                    | Australia = 6<br>Lebanon = 2                                                                                               |
| <b>6. Young adults</b> | 8                             | Female = 5<br>Male = 3                       | 18-25 = 4<br>26-35 = 4                                                             | English                                               | Australia = 8                                                                                                              |
| <b>7. Women</b>        | 8                             | Female = 8                                   | 26-35 = 3<br>36-50 = 5                                                             | English                                               | Lebanon = 4<br>Australia = 3<br>Egypt = 1                                                                                  |
| <b>8. Young women</b>  | 6                             | Female = 6                                   | 18-25 = 4<br>26-35 = 2                                                             | English                                               | Australia = 6                                                                                                              |
| <b>9. Young adults</b> | 16                            | Female = 6<br>Male = 10                      | 18-25 = 10<br>26-35 = 6                                                            | English                                               | Australia = 12<br>Egypt = 1<br>Libya = 1<br>Nepal = 1<br>Sudan = 1                                                         |
| <b>10. BCRA</b>        | 4                             | Female = 3<br>Male = 1                       | 18-25 = 1<br>26-35 = 1<br>36-50 = 2                                                | English                                               | Australia = 3<br>Lebanon = 1                                                                                               |
| <b>TOTAL</b>           | <b>88</b>                     | Female = 45<br>Male = 42<br>Not recorded = 1 | 18-25 = 40<br>26-35 = 31<br>36-50 = 14<br>51-60 = 1<br>60+ = 1<br>Not recorded = 1 | English = 5<br>Arabic and English = 5                 | Australia = 59<br>Lebanon = 20<br>Egypt = 2<br>Iraq = 2<br>Bahrain = 1<br>Libya = 1<br>Nepal = 1<br>Sudan = 1<br>Syria = 1 |
